# Supplementary material for: Exploring Sources of Ice Crystals in Cirrus Clouds: Comparative Analysis of Two Ice Nucleation Schemes in CAM6
Source: Copernicus journal article supplement (doi:10.5194/egusphere-2024-4144), 2025-01-23
Supplement: Supplementary file 1 [file egusphere-2024-4144-supplement.pdf]

1 Supporting Information for

2 **Exploring Sources of Ice Crystals in Cirrus Clouds:**  
3 **Comparative Analysis of Two Ice Nucleation Schemes in**  
4 **CAM6**

5 Kai Lyu<sup>1</sup>, Xiaohong Liu<sup>1</sup>, Bernd Kärcher<sup>2</sup>

6 <sup>1</sup>Department of Atmospheric Sciences, Texas A&M University, College Station, 77840, USA

7 <sup>2</sup>DLR Institut für Physik der Atmosphäre, Oberpfaffenhofen, Wessling, 82234, Germany

8 \*Correspondence to: Xiaohong Liu ([xiaohong.liu@tamu.edu](mailto:xiaohong.liu@tamu.edu))

9

10 **Contents of this file**

11 Figures S1 to S9

12 **Introduction**

13 This supporting information provides additional plots referenced in the paper which are  
14 not central to the conclusions of the paper.

15

16

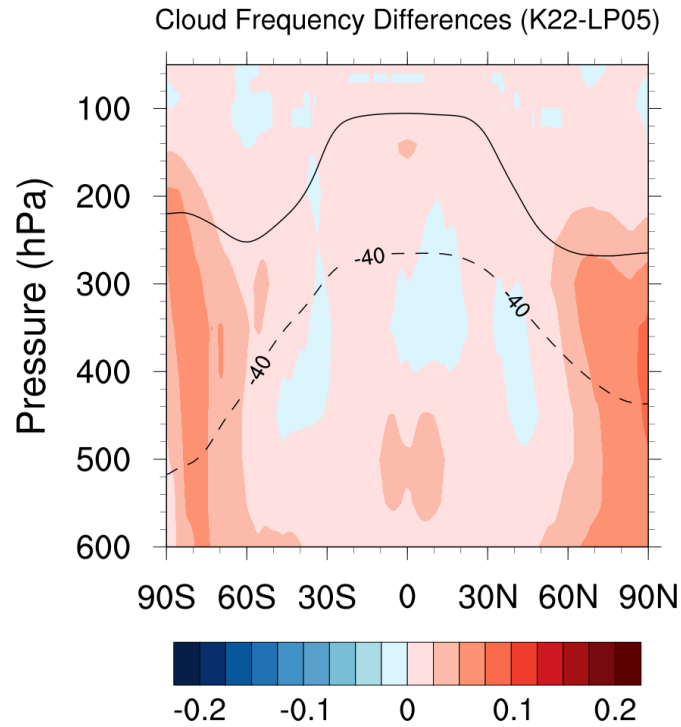

17

18 Figure S1. Annual zonal differences in cirrus cloud frequency between the K22\_OGW-  
 19 Climo and LP05\_OGW-Climo experiments. The cirrus clouds are defined as occurring  
 20 when  $T \leq -40$  °C with  $N_i \geq 0.01$  L<sup>-1</sup> and  $IWC \geq 1 \times 10^{-5}$  g m<sup>-3</sup>. Dashed lines indicate the  
 21 annual mean -40°C isothermal line, and solid lines represent the tropopause in the  
 22 corresponding simulations.

23

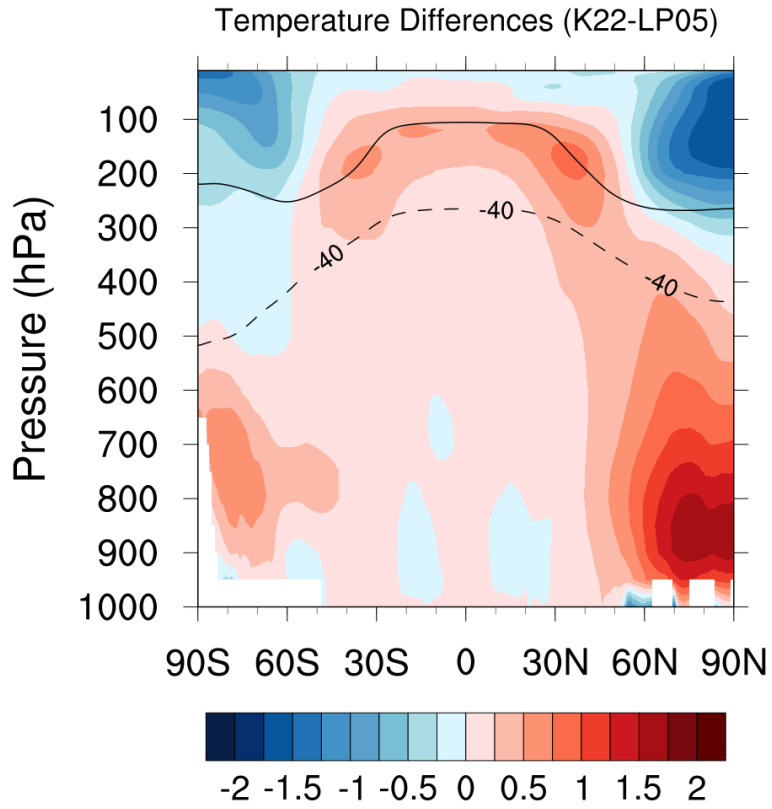

24

25 Figure S2. Annual zonal temperature differences (Unit: K) between the K22\_OGW-  
26 Climo and LP05\_OGW-Climo experiments. Dashed lines represent the annual mean -  
27 40°C isothermal line, and solid lines are the tropopause in the corresponding simulations.

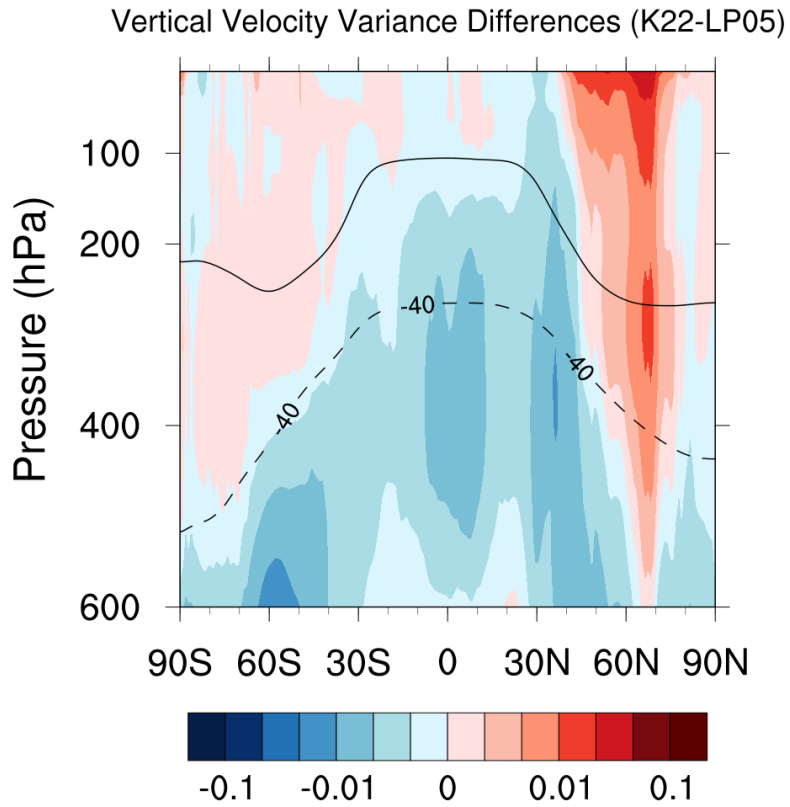

28

29 Figure S3. Annual zonal differences in vertical velocity variances for ice nucleation  
30 (Unit:  $\text{m s}^{-1}$ ) between the K22\_OGW-Climo and LP05\_OGW-Climo experiments.  
31 Dashed lines represent the annual mean  $-40\text{ }^{\circ}\text{C}$  isothermal line, and solid lines indicate  
32 the tropopause in the corresponding simulations.

33

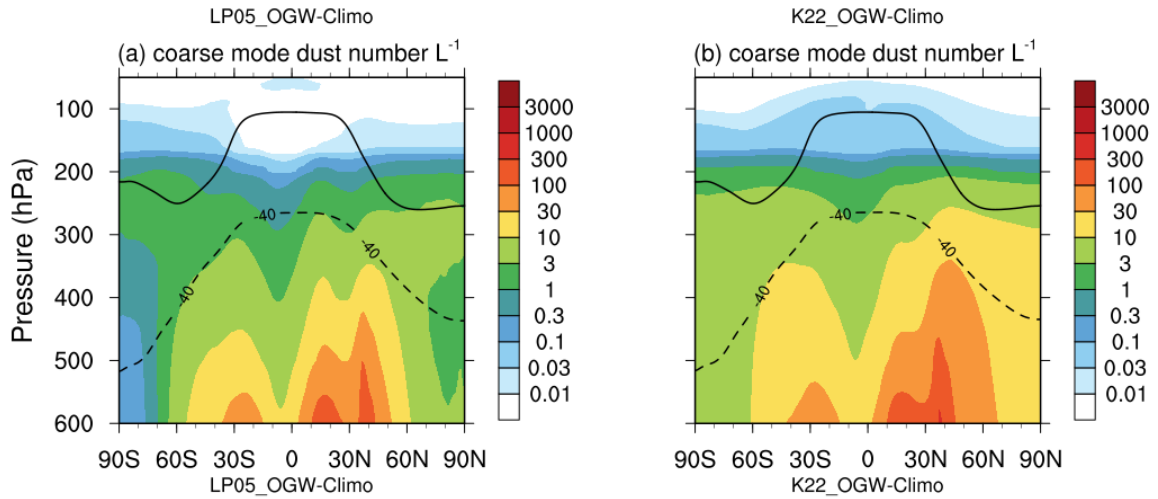

34

35 Figure S4. Annual zonal coarse mode dust number concentration from 6-year climatology  
 36 simulations ( the K22\_OGW-Climo and LP05\_OGW-Climo experiments) in the upper  
 37 troposphere (above 600 hPa). Dashed lines represent the annual mean  $-40^{\circ}\text{C}$  isothermal  
 38 line, and solid lines indicate the tropopause in the corresponding simulations.

39

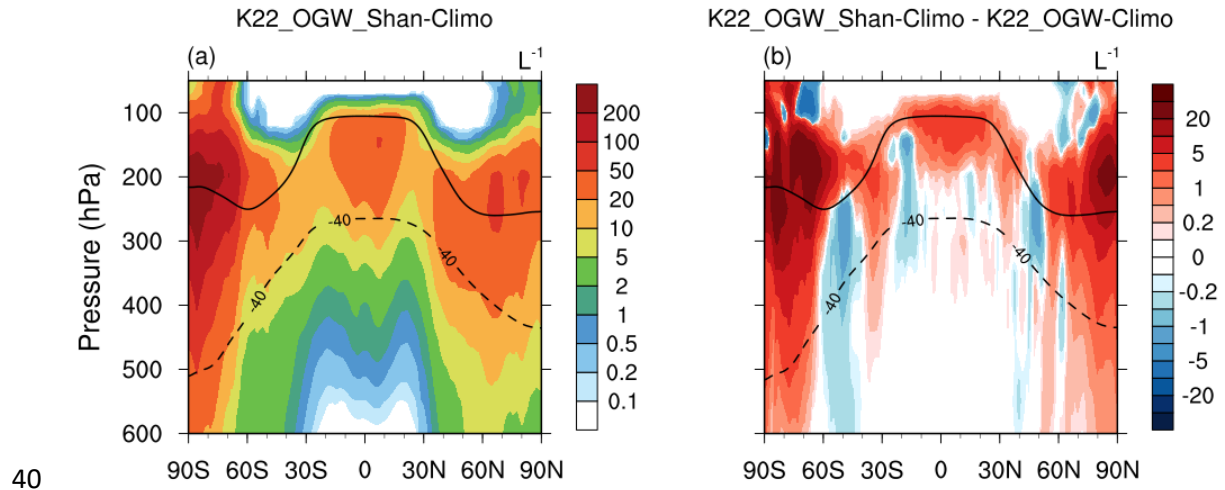

41 Figure S5. Annual zonal grid-mean ice number concentration ( $N_i$ ) from 6-year  
 42 climatology simulation (K22\_OGW\_Shan-Climo), and the differences between  
 43 K22\_OGW-Climo and K22\_OGW\_Shan-Climo experiments in the upper troposphere  
 44 (above 600 hPa). Dashed lines represent the annual mean -40°C isothermal line, and solid  
 45 lines indicate the tropopause in the corresponding simulations.

46

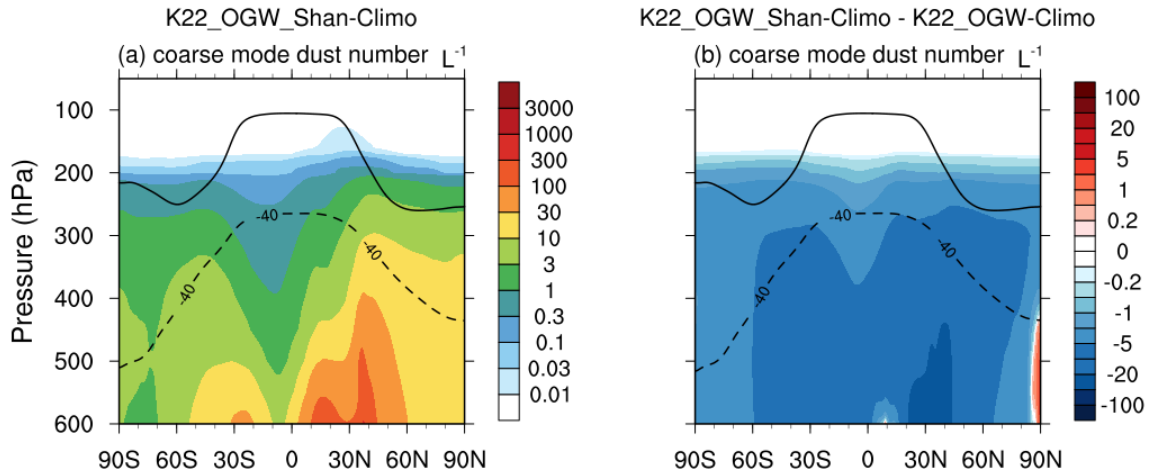

47

48 Figure S6. Annual zonally coarse mode dust number concentration from 6-year  
 49 climatology simulation (K22\_OGW\_Shan-Climo), and the differences between  
 50 K22\_OGW-Climo and K22\_OGW\_Shan-Climo experiments in the upper troposphere  
 51 (above 600 hPa). Dashed lines represent the annual mean  $-40^{\circ}\text{C}$  isothermal line, and solid  
 52 lines indicate the tropopause in the corresponding simulations.

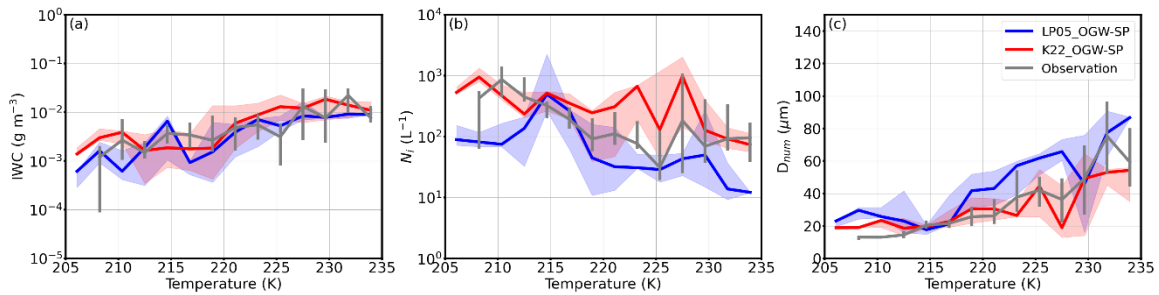

53

54 Figure S7. Comparison of IWC (a),  $N_i$  (b) and  $D_{\text{num}}$  (c) with respect to temperature  
 55 between observations, LP05\_OGW-SP and K22\_OGW-SP experiments for  
 56 orographic cirrus (5 days) during the SPARTICUS campaign.

57

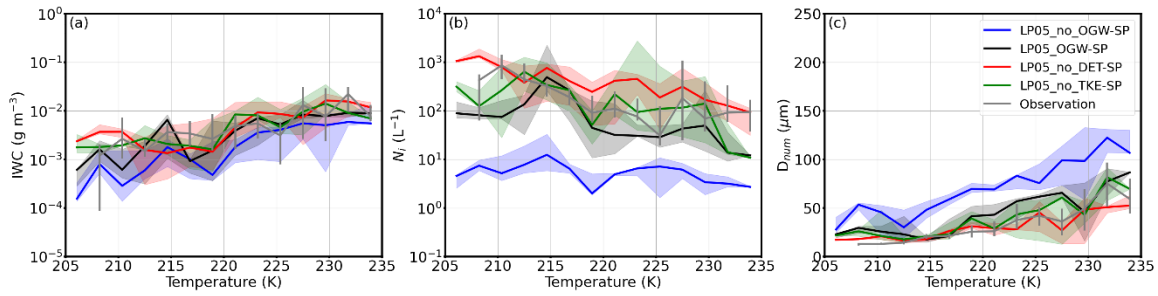

58

59 Figure S8. Comparison of IWC (a),  $N_i$  (b) and  $D_{\text{num}}$  (c) with respect to temperature  
 60 between observations, and LP05 experiments (LP05\_OGW-SP, LP05\_no\_OGW-SP,  
 61 LP05\_OGW\_no\_DET-SP and LP05\_no\_TKE-SP).

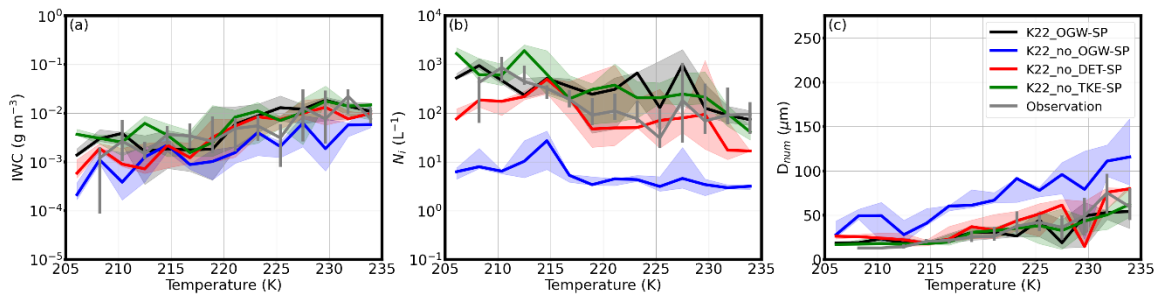

62

63 Figure S9. Same as Fig. S8 but between observations and K22 experiments  
 64 (K22\_OGW-SP, K22\_no\_OGW-SP, K22\_no\_DET-SP and K22\_no\_TKE-SP).

65

66
